# Supplementary material for: A new family of metal borohydride ammonia borane complexes: Synthesis, structures, and hydrogen storage properties
Source: Royal Society of Chemistry journal article supplement (doi:10.1039/c0jm01542c), 2010-01-01
Supplement: c0jm01542c.pdf [file c0jm01542c.pdf]

# Supporting Information

## A New Family of Metal Borohydride Ammonia Borane Complexes: Synthesis, Structures, and Hydrogen Storage Properties

Hui Wu<sup>1,2,\*</sup>, Wei Zhou<sup>1,2</sup>, Frederick E. Pinkerton,<sup>3</sup> Martin S. Meyer<sup>3</sup>, Gadipelli.  
Srinivas<sup>1,4</sup>, Taner Yildirim<sup>1,4</sup>, Terrence J. Udovic<sup>1</sup>, John J. Rush<sup>1,2</sup>

<sup>1</sup> NIST Center for Neutron Research, National Institute of Standards and Technology, Gaithersburg MD 20899, USA.

<sup>2</sup> Department of Materials Science and Engineering, University of Maryland, College Park MD 20742, USA.

<sup>3</sup> Chemical Sciences and Materials Systems Laboratory, General Motors Research and Development Center, Warren, MI 48090-9055, USA

<sup>4</sup> Department of Materials Science and Engineering, University of Pennsylvania, Philadelphia PA 19104, USA.

\*E-mail: huiwu@nist.gov

Table S1. Calculated structural parameters of  $\text{Li}_2(\text{BH}_4)_2(\text{NH}_2\text{BH}_3)$  ( $\text{LiBH}\cdot\text{AB}$ , Space group  $Pnma$ , No. 62, refined lattice parameters  $a=8.3118(8)$  Å,  $b=12.428(1)$ Å,  $c=6.5944(7)$ Å)

| Atom | Site | x        | y      | z      |
|------|------|----------|--------|--------|
| Li1  | 8d   | 0.3318   | 0.9228 | 0.9681 |
| B2   | 8d   | 0.0995   | 0.5736 | 0.7190 |
| H3   | 8d   | 0.1709   | 0.6520 | 0.7861 |
| H4   | 8d   | 0.1636   | 0.4892 | 0.7734 |
| H5   | 8d   | -0.03842 | 0.5740 | 0.7845 |
| H6   | 8d   | 0.1020   | 0.5809 | 0.5327 |
| H7   | 8d   | 0.2996   | 0.1705 | 0.6705 |
| H8   | 8d   | 0.0767   | 0.1837 | 0.9487 |
| B9   | 8c   | 0.7848   | 0.75   | 0.3091 |
| H10  | 8c   | 0.8982   | 0.75   | 0.4280 |
| H11  | 8c   | 0.7616   | 0.75   | 0.9778 |
| N12  | 8c   | 0.8533   | 0.75   | 0.0830 |

Table S2. Calculated structural parameters of  $\text{Ca}(\text{BH}_4)_2(\text{NH}_2\text{BH}_3)_2$  ( $\text{CaBH}\cdot\text{AB}$ , Space group  $Aba2$ , No. 41, refined lattice parameters  $a=8.265(1)$  Å,  $b=13.478(2)$ Å,  $c=8.136(1)$ Å)

| Atom | Site | x      | y      | z      |
|------|------|--------|--------|--------|
| B1   | $8b$ | 0.0544 | 0.2092 | 0.7237 |
| B2   | $8b$ | 0.7273 | 0.0082 | 0.5747 |
| N3   | $8b$ | 0.0007 | 0.1874 | 0.2995 |
| H4   | $8b$ | 0.0674 | 0.3381 | 0.1879 |
| H5   | $8b$ | 0.1361 | 0.1655 | 0.8259 |
| H6   | $8b$ | 0.3630 | 0.2255 | 0.1029 |
| H7   | $8b$ | 0.0880 | 0.1530 | 0.2291 |
| H8   | $8b$ | 0.0940 | 0.3622 | 0.8057 |
| H9   | $8b$ | 0.0470 | 0.1941 | 0.4173 |
| H10  | $8b$ | 0.1314 | 0.0067 | 0.5362 |
| H11  | $8b$ | 0.3520 | 0.0650 | 0.5352 |
| H12  | $8b$ | 0.2875 | 0.4806 | 0.2240 |
| H13  | $8b$ | 0.1788 | 0.4165 | 0.5045 |
| Ca14 | $8a$ | 0.5    | 0      | 0.3034 |

Table S3. Average calculated bond lengths of  $\text{Li}_2(\text{BH}_4)_2\text{NH}_3\text{BH}_3$  and  $\text{Ca}(\text{BH}_4)_2(\text{NH}_3\text{BH}_3)_2$

| Bond                                                   | Length (Å)                                         |                                                      |                          |
|--------------------------------------------------------|----------------------------------------------------|------------------------------------------------------|--------------------------|
|                                                        | $\text{Li}_2(\text{BH}_4)_2\text{NH}_3\text{BH}_3$ | $\text{Ca}(\text{BH}_4)_2(\text{NH}_3\text{BH}_3)_2$ | $\text{NH}_3\text{BH}_3$ |
| N-B                                                    | 1.596                                              | 1.591                                                | 1.592                    |
| N-H(AB)                                                | 1.030                                              | 1.032                                                | 1.030                    |
| B-H(AB)                                                | 1.222                                              | 1.222                                                | 1.222                    |
| B-H( $\text{BH}_4$ )                                   | 1.228                                              | 1.229                                                |                          |
| $\text{H}_\text{N}-\text{H}_\text{B}$<br>(in AB layer) | 2.439                                              | 1.735                                                | 2.02 <sup>1</sup>        |
| $\text{H}_\text{N}-\text{H}_{\text{BH}_4}$             | 2.248                                              | 2.036                                                |                          |

<sup>1</sup> Klooster, W.T.; Koetzle, T.F.; Siegbahn, P. E. M.; Richardson, T. B.; Crabtree, R. H. *J. Am. Chem. Soc.* **1999**, *121*, 6337.

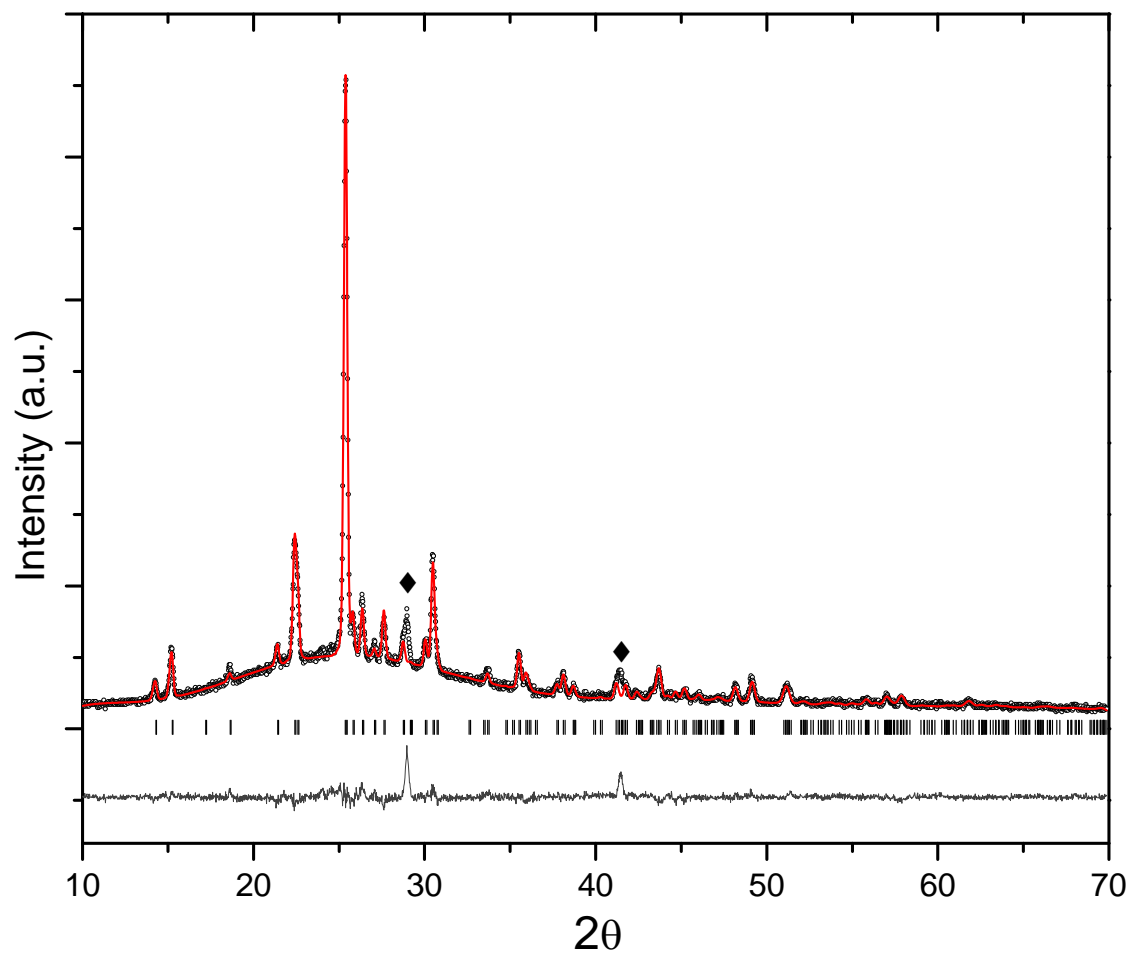

Figure S1. Experimental (circles), fitted (line), and difference (line below observed and calculated patterns) XRD profiles for  $\text{Li}_2(\text{BH}_4)_2\text{NH}_3\text{BH}_3$  at 298 K. Vertical bars indicate the calculated positions of Bragg peaks for  $\text{Li}_2(\text{BH}_4)_2\text{NH}_3\text{BH}_3$ . The patterns also contain peaks of impurity phase from the  $\text{NH}_3\text{BH}_3$  precursor (90% Aldrich, indicated by solid diamond) as identified in the previous study<sup>2</sup>.

<sup>2</sup> Wu, H.; Zhou, W.; Yildirim, T. *J. Am. Chem. Soc.* **2008**, *130*, 14834–14839.

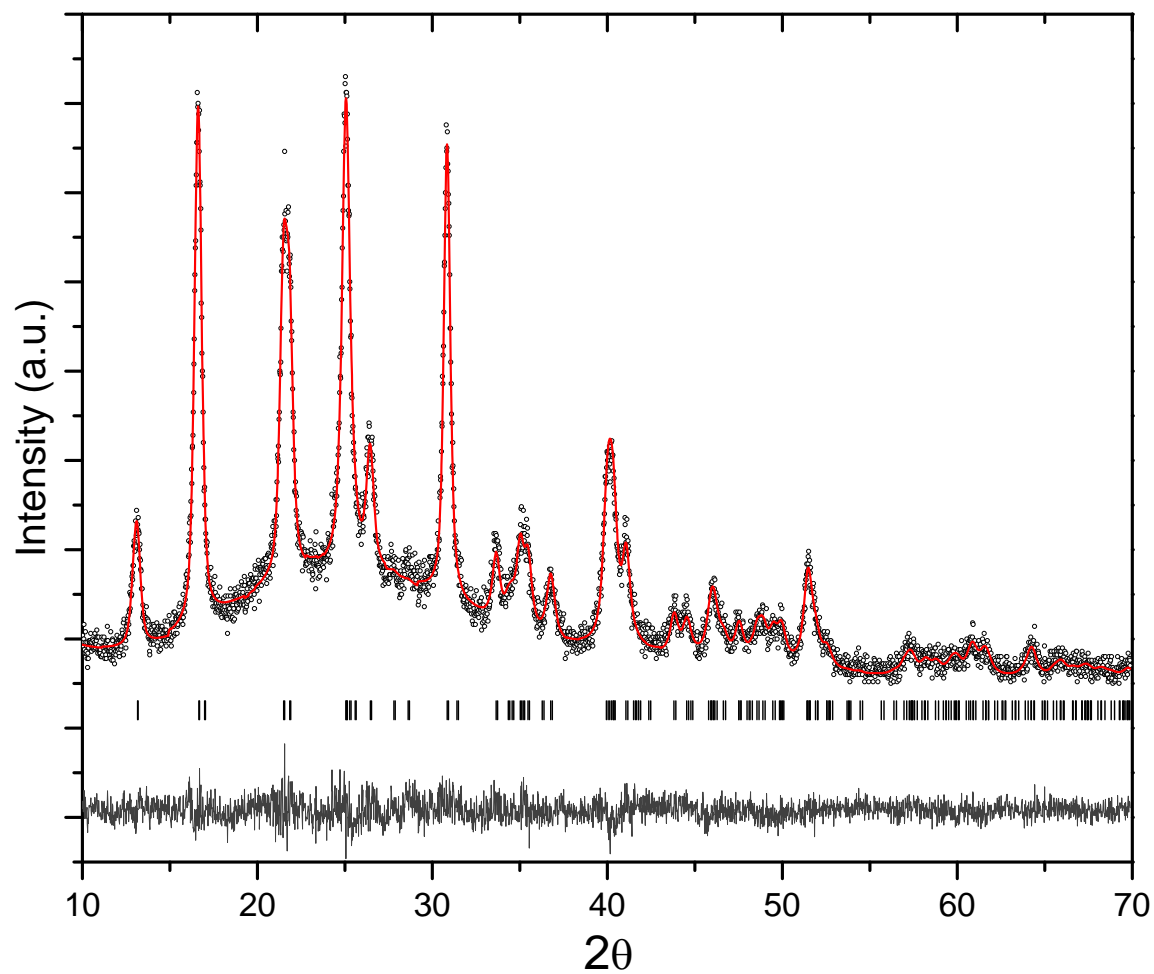

Figure S2. Experimental (circles), fitted (line), and difference (line below observed and calculated patterns) XRD profiles for  $\text{Ca}(\text{BH}_4)_2(\text{NH}_3\text{BH}_3)_2$  at 298 K. Vertical bars indicate the calculated positions of Bragg peaks for  $\text{Ca}(\text{BH}_4)_2(\text{NH}_3\text{BH}_3)_2$ .

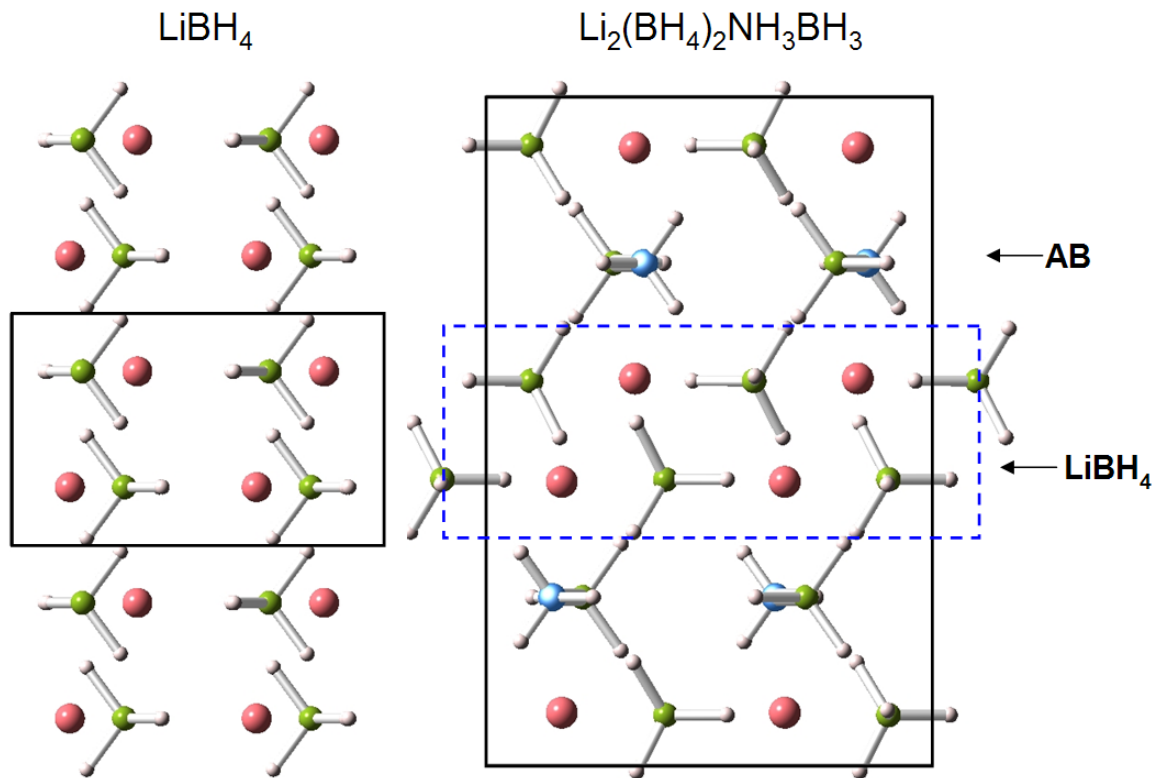

Figure S3 Comparison of the structures ([001] view) of  $\text{LiBH}_4$  and  $\text{Li}_2(\text{BH}_4)_2\text{NH}_3\text{BH}_3$ . Note:  $\text{Li}_2(\text{BH}_4)_2\text{NH}_3\text{BH}_3$  contains alternating layers of  $\text{LiBH}_4$  and  $\text{NH}_3\text{BH}_3$ . The unit cells of  $\text{LiBH}_4$  and  $\text{Li}_2(\text{BH}_4)_2\text{NH}_3\text{BH}_3$  are plotted in grey line. The  $\text{LiBH}_4$  block in  $\text{Li}_2(\text{BH}_4)_2\text{NH}_3\text{BH}_3$  cell is highlighted in blue.

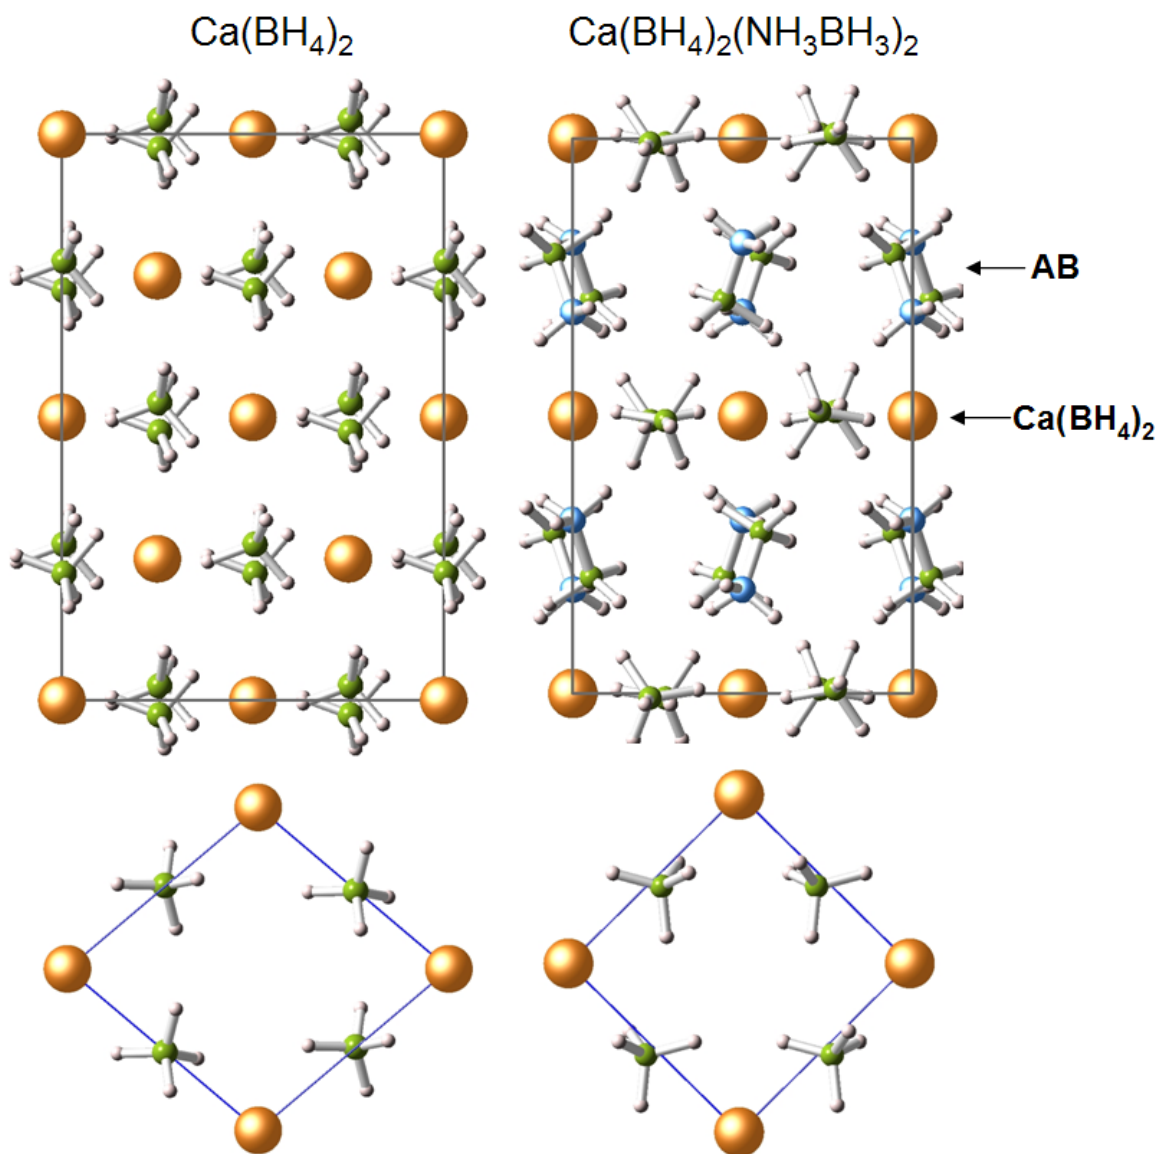

Figure S4 Top: Comparison of the structures ([001] view) of  $\text{Ca}(\text{BH}_4)_2$  and  $\text{Ca}(\text{BH}_4)_2(\text{NH}_3\text{BH}_3)_2$ . Note:  $\text{Ca}(\text{BH}_4)_2(\text{NH}_3\text{BH}_3)_2$  contains alternating layers of  $\text{Ca}(\text{BH}_4)_2$  and  $\text{NH}_3\text{BH}_3$ . Bottom: comparison of lattice arrangement of  $\text{Ca}(\text{BH}_4)_2$  and the  $\text{Ca}(\text{BH}_4)_2$  layer of  $\text{Ca}(\text{BH}_4)_2(\text{NH}_3\text{BH}_3)_2$ .

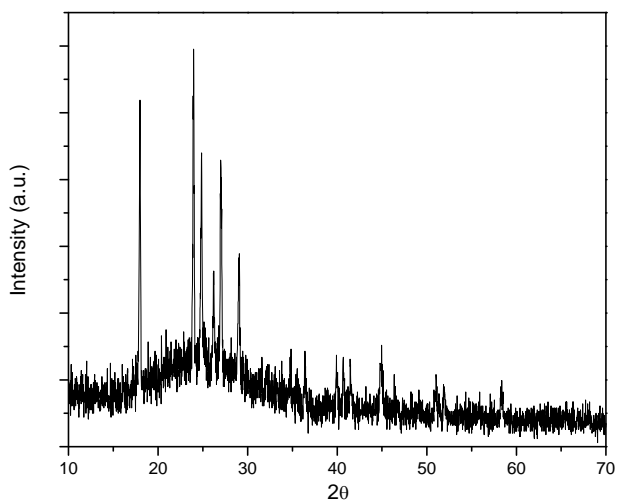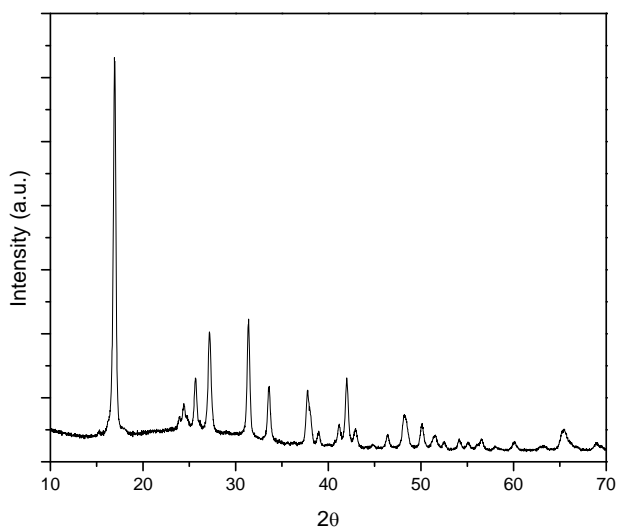

Figure S5 Top: XRD pattern of  $\text{Li}_2(\text{BH}_4)_2\text{NH}_3\text{BH}_3$  after the 1<sup>st</sup> step desorption, indicating the product is  $\text{LiBH}_4$ . Bottom: XRD pattern of  $\text{Ca}(\text{BH}_4)_2(\text{NH}_3\text{BH}_3)_2$  after the 1<sup>st</sup> step desorption, the main product is  $\text{Ca}(\text{BH}_4)_2$ .



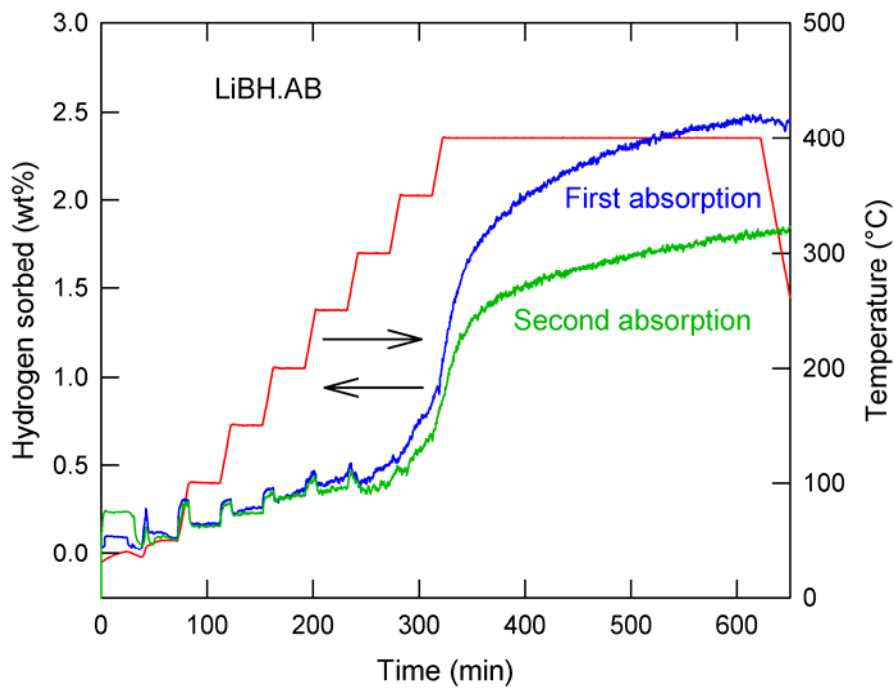

Figure S6(a) First and second rehydrogenation for LiBH·AB up to 400°C.

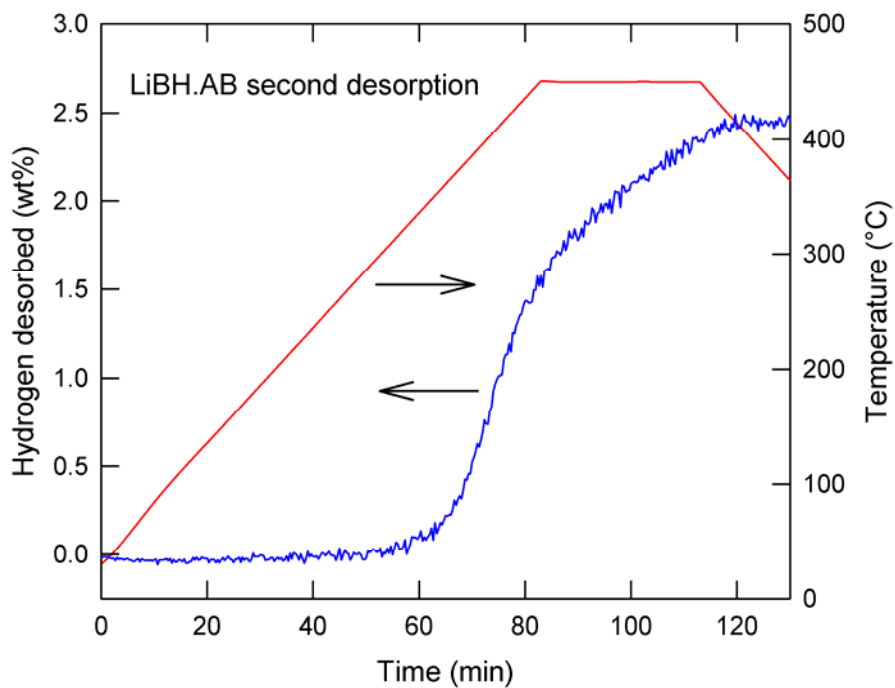

Figure S6(b) Second desorption (between 1<sup>st</sup> and 2<sup>nd</sup> hydrogenation) for LiBH·AB. RGA indicates that the second desorption is comprised only of H<sub>2</sub>.

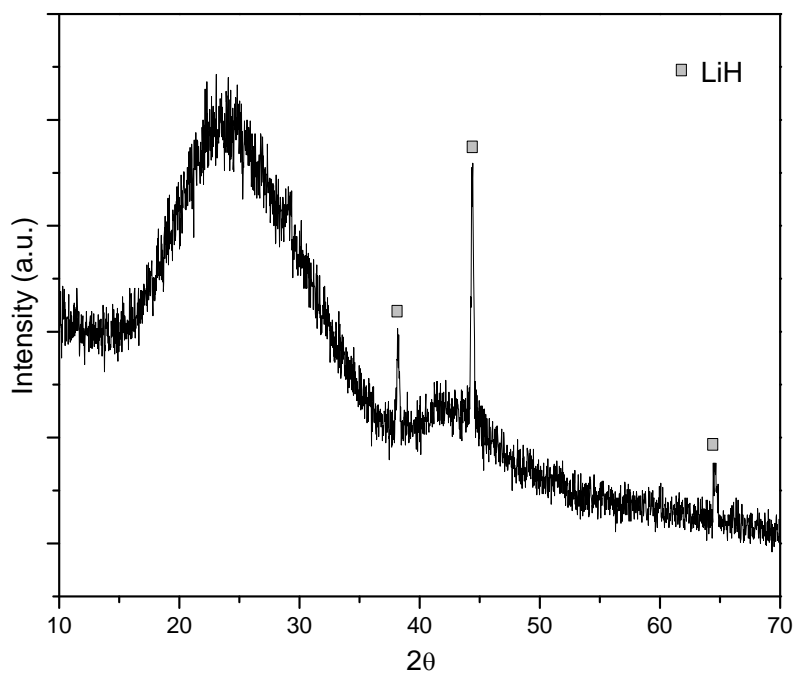

Figure S7 XRD pattern of LiBH·AB after rehydrogenation

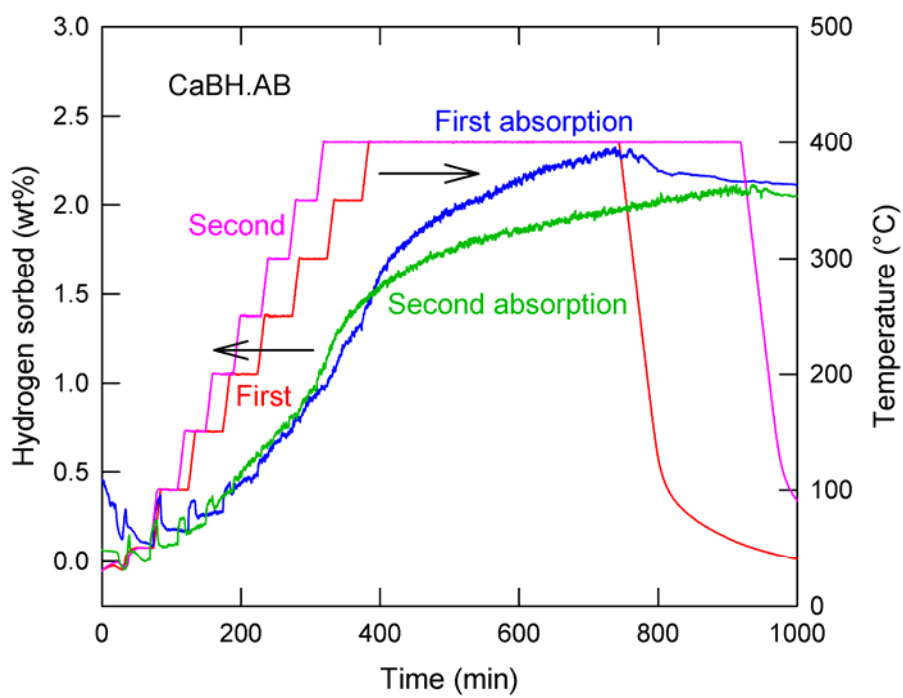

Figure S8(a) First and second rehydrogenation for CaBH·AB up to 400°C.

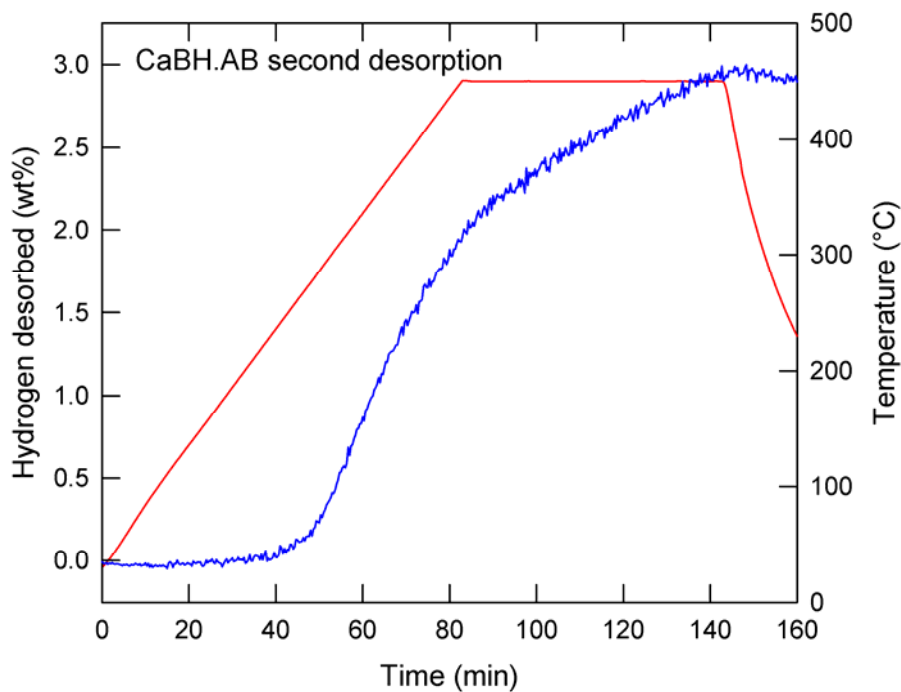

Figure S8(b) Second desorption (between 1<sup>st</sup> and 2<sup>nd</sup> hydrogenation) for CaBH·AB. RGA indicates that the second desorption is comprised only of H<sub>2</sub>.

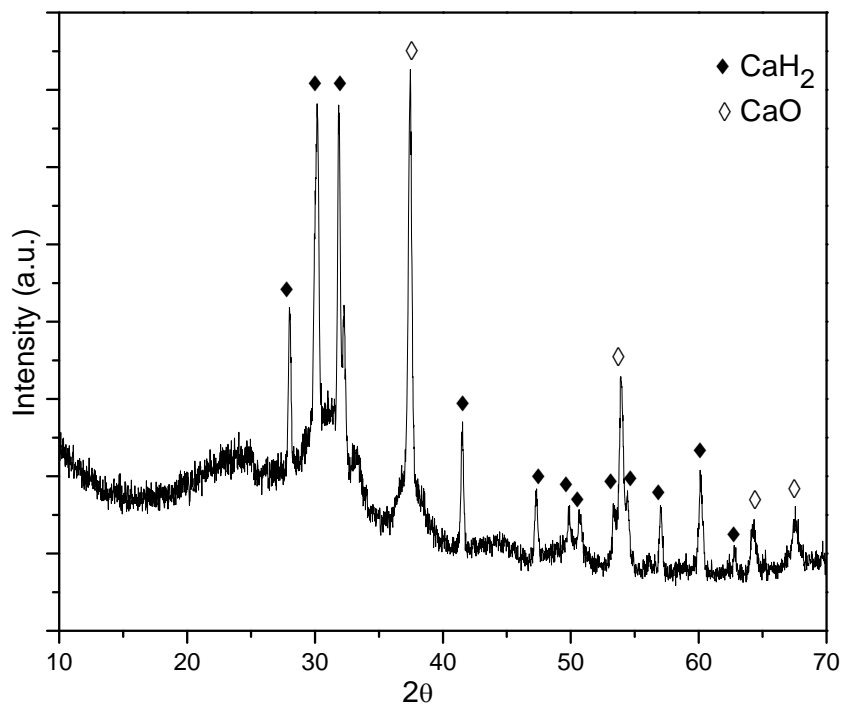

Figure S9 XRD pattern of CaBH·AB after rehydrogenation
